# Supplementary material
Source: publisher site journal article supplement (https://www.dovepress.com/article/484352)
Supplement: Supplementary file 1 [file get_supplementary_file.php]

**Supplementary information 1:**

All administered tests in this study were developed and validated using the CHARLS database. The MMSE is a widely recognized cognitive function assessment tool. The Chinese version of the MMSE, validated for use in Alzheimer’s disease patients, individuals with depression, and the general population, demonstrates strong validity and reliability. Studies report a Cronbach’s alpha value of 0.902 for the Chinese MMSE1. Fried’s Frailty Phenotype (FFP) is a well-established method for identifying frailty by assessing symptoms and signs associated with biological aging, including atrophy, exhaustion, weakness, slowness, and low levels of physical activity. The latter three measures were evaluated using grip strength, gait speed, and a physical activity scale, respectively. Frailty was assessed according to the FFP criteria. A Chinese-modified frailty phenotype (CMFP) was developed, incorporating specific cutoffs for grip strength and alternative tests for walking speed. Internal consistency reliability of the CMFP, measured by Cronbach’s alpha, yielded values above 0.60, indicating good reliability2.

In this study, the Center for Epidemiologic Studies Depression Scale (CES-D-10) was used to assess depressive symptoms based on the CHARLS questionnaire. The CES-D-10 has proven to be highly reliable and valid for evaluating depressive symptoms in middle-aged and older adults3. Previous studies have demonstrated reasonable sensitivity (0.85) and specificity (0.80) of the CES-D-10 among Chinese adults. The CES-D-10 also exhibits satisfactory reliability in terms of internal consistency, with Cronbach’s alpha ranging from 0.78 to 0.794.

1. Katzman R, Zhang MY, Ouang Ya Q, et al. A Chinese version of the Mini-Mental State Examination; impact of illiteracy in a Shanghai dementia survey. *J Clin Epidemiol.* 1988;41(10):971-978.

2. Ye B, Li Y, Wang Y, et al. A Modified Frailty Phenotype Used for Identifying Frailty in Health Care Practice: Validation Among Chinese Older Adults. *J Am Med Dir Assoc.* 2024;25(7):105016.

3. Chen H, Mui AC. Factorial validity of the Center for Epidemiologic Studies Depression Scale short form in older population in China. *Int Psychogeriatr.* 2014;26(1):49-57.

4. Iulita MF, Bejanin A, Vilaplana E, et al. Association of biological sex with clinical outcomes and biomarkers of Alzheimer's disease in adults with Down syndrome. *Brain Commun.* 2023;5(2):fcad074.

**Supplementary Table 1.** The proportion of patients with no diseased, frailty, cognitive impairment, and cognitive frailty across different age groups (N=4514).

| Age | Total (%) | No diseased (%) b | Frailty (%) | Cognitive impairment (%) | Cognitive frailty (%) |
| --- | --- | --- | --- | --- | --- |
| 45-65 | 3085 (68.34%) a | 1847 (59.87%) b | 698 (22.63%) b | 340 (11.02%) b | 200 (6.48%) b |
| ≥65 | 1429 (31.66%) a | 507 (35.48%) b | 630 (44.09%) b | 86 (6.02%) b | 206 (14.42%) b |

a: Number in different age groups (percentage of total number in different age groups)

b: Number of people with different groups (percentage of people with different groups in each age group)
